# Supplementary material
Source: PubMed Central journal article supplement (PMC2671229)
Supplement: NIHMS102486-supplement-Sup_Table_1.pdf [file NIHMS102486-supplement-Sup_Table_1.pdf]

**Supplemental Table 1: Described Pathophysiological Features of Human AD and AD Model Mice**

|                                        | Human AD                                                                  | Ox Mice       | TNCB             | IL-4Tg      | IL-18Tg        | NC/Nga                        |
|----------------------------------------|---------------------------------------------------------------------------|---------------|------------------|-------------|----------------|-------------------------------|
| <b><i>Clinical Appearance</i></b>      |                                                                           |               |                  |             |                |                               |
| Scaling/excoriation/scratching         | (+)                                                                       | (+)           | (+)              | (+)         | (+)            | (+)                           |
| <b><i>Physiology</i></b>               |                                                                           |               |                  |             |                |                               |
| Barrier                                | ↓                                                                         | ↓             | ↓                |             |                | ↓                             |
| Hydration                              | ↓                                                                         | ↓             | ↓                |             |                | ↓                             |
| pH                                     | ↑                                                                         | ↑             | ↑                |             |                |                               |
| <b><i>Immunologic phenotype</i></b>    |                                                                           |               |                  |             |                |                               |
| TH2 dominant infiltrate                | ↑                                                                         | ↑             | ↑                |             |                | ↑                             |
| IgE                                    | ↑                                                                         | ↑             | ↑                | ↑           | ↑              | ↑                             |
| Mast Cells                             | ↑                                                                         | ↑             | ↑                | ↑           | ↑              | ↑                             |
| <b><i>Hyperproliferation</i></b>       | (+)                                                                       | (+)           |                  | (+)         | (+)            | (+)                           |
| <b><i>Abnormal Differentiation</i></b> | ↓                                                                         | ↓             |                  |             |                |                               |
| References                             | Proksch (2006)<br>Tagami (2006)<br>Boguniewicz (2006)<br>Damsgaard (1997) | present study | Matsumoto (2004) | Chan (2001) | Konishi (2002) | Matsuda (1997)<br>Aioi (2001) |
